# Supplementary material
Source: ML conference proceedings conference paper supplement (https://openaccess.thecvf.com/content/ICCV2021/html/Fan_SUNet_Symmetric_Undistortion_ICCV_2021_paper.html)
Supplement: Supplementary file 2 [file Fan_SUNet_Symmetric_Undistortion_ICCV_2021_supplemental.zip]

Archive with 9 entries (5 files):
- 06199-supp/
- 06199-supp/.vs/
- 06199-supp/.vs/06199-supp/
- 06199-supp/.vs/06199-supp/v15/
- 06199-supp/.vs/06199-supp/v15/.suo
- 06199-supp/.vs/slnx.sqlite
- 06199-supp/.vs/VSWorkspaceState.json
- 06199-supp/06199-supp.pdf
- 06199-supp/Demo_Video.mp4
