# Supplementary material
Source: ML conference proceedings conference paper supplement (https://openaccess.thecvf.com/content/ICCV2021/html/Fan_SUNet_Symmetric_Undistortion_ICCV_2021_paper.html)
Supplement: Supplementary file 2 [file Fan_SUNet_Symmetric_Undistortion_ICCV_2021_supplemental.zip › 06199-supp/.vs/VSWorkspaceState.json]

{
  "ExpandedNodes": [
    ""
  ],
  "PreviewInSolutionExplorer": false
}
